# Supplementary material for: The Diagnostic Value of Preoperative Hematology Makers in the Classification and Molecular Subtypes of Newly Diagnosed High-Grade Gliomas
Source: Research Square preprint supplement (doi:10.21203/rs.3.rs-569387/v2), 2021-07-07
Supplement: Supplementary file 1 [file ae05b39fc5e12a4a166e48c2.docx]

**Table S1 The Comparison of hematology indexes in IDH groups**

| Variable | IDH-wt | IDH-mut | P-value |
| --- | --- | --- | --- |
| PLR | 137.83±70.94 | 135.05±55.93 | 0.775 |
| NLR | 3.46±3.01 | 2.79±2.03 | 0.035 |
| MLR | 0.30±0.16 | 0.29±0.11 | 0.856 |
| FIB | 3.11±0.82 | 2.71±0.66 | 0.000 |
| ALB | 42.08±3.53 | 42.4±3.41 | 0.529 |
| GLOB | 24.39±4.11 | 24.2±4.04 | 0.737 |
| AGR | 1.78±0.35 | 1.80±0.32 | 0.654 |
| PNI | 50.93±4.84 | 51.44±4.67 | 0.455 |

**Table S2 The Analysis of hematology indexes in IDH subgroups**

| Variable | Group 1 | Group 2 | Group 3 | Group 4 | F | P-value |
| --- | --- | --- | --- | --- | --- | --- |
| PLR | 137.95±107.24 | 138.43±61.14 | 137.83±67.64 | 129.20±46.31 | 0.111 | 0.954 |
| NLR | 3.00±2.96 | 2.67±1.75 | 3.50±3.02 | 2.99±2.48 | 1.161 | 0.324 |
| MLR | 0.27±0.12 | 0.29±0.09 | 0.30±0.16 | 0.31±0.14 | 0.412 | 0.744 |
| FIB | 3.10±0.67 | 2.69±0.59 | 3.11±0.83 | 2.75±0.77 | 4.160 | 0.006 |
| ALB | 42.16±2.65 | 42.13±2.71 | 42.08±3.59 | 42.86±4.41 | 0.335 | 0.800 |
| GLOB | 23.57±3.96 | 23.74±3.79 | 24.45±4.12 | 24.98±4.40 | 0.761 | 0.517 |
| AGR | 1.83±0.31 | 1.82±0.35 | 1.77±0.35 | 1.76±0.28 | 0.445 | 0.721 |
| PNI | 52.43±5.75 | 51.48±4.40 | 50.81±4.76 | 51.36±5.20 | 0.922 | 0.430 |

**Table S3 The Association of Hematological Indicators With Age, Gender, pEPI and pKPS in G3**

| variable | age | |  | gender | |  | pEPI | |  | pKPS | |  |
| --- | --- | --- | --- | --- | --- | --- | --- | --- | --- | --- | --- | --- |
| r | P-value |  | Female | Male | P-value | wit-pEPI | ex-pEPI | p | ≤70 | ＞70 | P-value |
| PLR | 0.244 | 0.063 |  | 132.84±44.92 | 142.84±100.71 | 0.635 | 140.66±87.53 | 129.77±43.19 | 0.667 | 132.86±46.11 | 143.85±104.35 | 0.601 |
| NLR | 0.229 | 0.081 |  | 2.3±1.19 | 3.19±2.80 | 0.110 | 2.99±2.46 | 2.07±0.93 | 0.194 | 2.76±1.77 | 2.82±2.67 | 0.916 |
| MLR | 0.047 | 0.726 |  | 0.29±0.11 | 0.27±0.08 | 0.358 | 0.28±0.10 | 0.29±0.10 | 0.684 | 0.29±0.09 | 0.27±0.11 | 0.430 |
| FIB | 0.105 | 0.430 |  | 2.74±0.54 | 2.92±0.72 | 0.291 | 2.84±0.71 | 2.85±0.36 | 0.940 | 2.81±0.65 | 2.86±0.66 | 0.796 |
| ALB | -0.133 | 0.314 |  | 41.8±2.30 | 42.43±2.94 | 0.373 | 41.95±2.70 | 42.79±2.52 | 0.320 | 42.12±2.28 | 42.16±3.05 | 0.956 |
| GLOB | 0.093 | 0.483 |  | 23.37±3.51 | 23.95±4.10 | 0.566 | 24.02±3.91 | 22.48±3.37 | 0.204 | 23.39±3.77 | 23.98±3.91 | 0.556 |
| AGR | -0.125 | 0.344 |  | 1.83±0.31 | 1.82±0.35 | 0.958 | 1.79±0.33 | 1.94±0.32 | 0.150 | 1.85±0.33 | 1.80±0.34 | 0.621 |
| PNI | -0.401 | 0.002 |  | 51.05±3.34 | 52.47±5.88 | 0.248 | 51.42±4.74 | 53.24±5.36 | 0.240 | 51.34±3.93 | 52.32±5.76 | 0.450 |

r, association coefficient

**Table S4 The Association of Hematological Indicators With Age, Gender, pEPI and pKPS in G4/GBM**

| variable | Age | |  | gender | |  | pEPI | |  | pKPS | |  |
| --- | --- | --- | --- | --- | --- | --- | --- | --- | --- | --- | --- | --- |
| r | P-value |  | Female | Male | P-value | wit-pEPI | ex-pEPI | P-value | ≤70 | ＞70 | P-value |
| PLR | -0.037 | 0.522 |  | 145.71±64.54 | 130.65±67.02 | 0.053 | 137.51±64.84 | 135.39±74.26 | 0.842 | 136.45±67.12 | 137.91±65.63 | 0.850 |
| NLR | -0.026 | 0.651 |  | 3.30±2.55 | 3.58±3.27 | 0.428 | 3.33±2.60 | 4.13±4.51 | 0.251 | 3.44±3.05 | 3.48±2.92 | 0.896 |
| MLR | -0.002 | 0.975 |  | 0.28±0.14 | 0.31±0.18 | 0.098 | 0.30±0.16 | 0.3±0.17 | 0.991 | 0.29±0.15 | 0.31±0.18 | 0.378 |
| FIB | 0.175 | 0.003 |  | 3.02±0.76 | 3.13±0.88 | 0.278 | 3.09±0.83 | 3.03±0.84 | 0.655 | 3.10±0.86 | 3.07±0.80 | 0.767 |
| ALB | -0.360 | 0.000 |  | 42.17±3.17 | 42.11±4.00 | 0.890 | 42.2±3.61 | 41.81±3.93 | 0.507 | 42.06±3.59 | 42.21±3.74 | 0.722 |
| GLOB | 0.046 | 0.431 |  | 25.54±3.84 | 23.69±4.19 | 0.000 | 24.33±4.13 | 25.38±4.08 | 0.112 | 24.27±4.31 | 24.71±3.96 | 0.357 |
| AGR | -0.205 | 0.000 |  | 1.69±0.28 | 1.83±0.38 | 0.000 | 1.79±0.35 | 1.69±0.31 | 0.080 | 1.79±0.39 | 1.75±0.30 | 0.275 |
| PNI | -0.334 | 0.000 |  | 50.63±4.02 | 51.02±5.30 | 0.474 | 50.89±4.81 | 50.67±4.70 | 0.775 | 50.71±4.67 | 51.00±4.91 | 0.610 |





**Figure S1** The correlation between FIB(a, e), ALB(b, f), AGR(c, g), and PNI(d, h) and age in G3 (a-d) and G4 (e-h) gliomas.
